# Supplementary material for: Safety of combination antiretroviral prophylaxis in high-risk HIV-exposed newborns: a retrospective review of the Canadian experience
Source: PubMed Central journal article supplement (PMC4753845; doi:10.7448/ias.19.1.20520), 2016-02-12
Supplement: JIAS-19-20520-s001.pdf [file JIAS-19-20520-s001.pdf]

**Supplementary Table: Multivariate model effect size estimates**

| <b>Parameter</b>                          | <b>Effect</b>         | <b>Estimate</b> | <b>95% CI</b>   | <b>P-value</b> |
|-------------------------------------------|-----------------------|-----------------|-----------------|----------------|
| Hemoglobin (g/L) *                        | cART vs ZDV           | -2.07           | -4.08; -0.06    | 0.04           |
|                                           | NVP-based cART vs ZDV | 0.30            | -2.38 ; 2.99    | 0.82           |
|                                           | PI-based cART vs ZDV  | -3.62           | -5.89 ; -1.34   | 0.002          |
| Neutrophil count (x10 <sup>6</sup> /L) ** | cART vs ZDV           | -0.005          | -0.206; 0.195   | 0.95           |
|                                           | NVP-based cART vs ZDV | 0.014           | -0.248 ; 0.276  | 0.91           |
|                                           | PI-based cART vs ZDV  | -0.020          | -0.253 ; 0.220  | 0.87           |
| Head Circumference (cm) ++                | cART vs ZDV           | -0.63 cm        | -0.95 ; -0.30   | 0.0002         |
|                                           | NVP-based cART vs ZDV | -0.8 cm         | -0.9 ; -0.1     | 0.007          |
|                                           | PI-based cART vs ZDV  | -0.5 cm         | -1.2 ; -0.4     | 0.0003         |
| Weight (grams)++                          | cART vs ZDV           | -0.283          | -0.426 ; -0.140 | 0.0001         |
|                                           | NVP-based cART vs ZDV | -0.254          | -0.445 ; -0.062 | 0.01           |
|                                           | PI-based cART vs ZDV  | -0.302          | -0.466 ; -0.138 | 0.0003         |
| Length (cm) ++                            | cART vs ZDV           | -0.92           | -1.51 ; -0.33   | 0.002          |
|                                           | NVP-based cART vs ZDV | -0.7            | -1.5 ; 0.1      | 0.07           |
|                                           | PI-based cART vs ZDV  | -1.0            | -1.7 ; -0.4     | 0.003          |

\* Adjusted for gestational age and visit

\*\* Adjusted for gestational age, ethnicity, visit

++ Adjusted for birthweight, gestational age, visit and gender
